# Supplementary material
Source: publisher site journal article supplement (https://static.cambridge.org/content/id/urn:cambridge.org:id:article:S2040174420000276/resource/name/S2040174420000276supp001.docx)
Supplement: Supplementary file 1 [file S2040174420000276supp001.docx]

Table 1: Summary table of final articles included in review

| **Author** | **Year** | **Setting/Country** | **n** | **Age Group** | **Early-life Factor(s)** | **Outcome(s)** | **Newcastle-Ottawa Quality Assessment** |
| --- | --- | --- | --- | --- | --- | --- | --- |
| Andersen et al.1 | 2011 | Denmark | 9869 | Children | Maternal gestational weight gain | BMI | ******** |
| Aris et al.2 | 2018 | Singapore | 858 | Children | Maternal gestational weight gain Raised maternal fasting glucose | BMI Waist-to-height ratio Fat mass index Overweight/obesity Sum of skinfolds | ******** |
| Bammann et al.3 | 2014 | Belgium, Cyprus, Estonia, Germany, Hungary, Italy, Spain, Sweden | 1024 | Children | Maternal gestational weight gain Birth weight | Overweight/obesity | ******** |
| Bann et al.4 | 2014 | United Kingdom | 1558 | Adults | Birth weight | Lean mass Fat mass | ******** |
| Bekkers et al.5 | 2011 | The Netherlands | 751 | Children | Birth weight Gestational diabetes | Total cholesterol HDL cholesterol | ******* |
| Bercovich et al.6 | 2014 | Israel | 300 | Adults | Maternal nutritional deficit (Holocaust exposure) | BMI Hypertension Diabetes Cancer Dyslipidemia | ******* |
| Bettiol et al.7 | 2007 | Brazil | 519 | Adolescents | Intrauterine growth restriction | BMI | ******** |
| Bhattacharya et al.8 | 2016 | United Kingdom | 3781 | Adults | Maternal gestational weight gain | Cardiovascular morbidity Cerebrovascular morbidity Mortality | ********* |
| Boone-Heinonen et al.9 | 2018 | United States | 13413 | Adults | Birth weight | (Pre)diabetes BMI | ******** |
| Borja10 | 2013 | Philippines | 1709 | Children, adolescents, adults | Birth weight Maternal nutritional status | Stunting Blood pressure Cardiovascular disease BMI Insulin resistance Triglyceride levels | ******* |
| Brei et al.11 | 2018 | Germany | 208 | Children | Maternal nutritional status | BMI Abdominal fat Fat mass | ********* |
| Chen et al12 | 2017 | Singapore | 910 | Children | Maternal nutritional status | BMI | ********* |
| Chen et al.13 | 2016 | Singapore | 1048 | Children | Maternal diet | BMI Abdominal circumference  Subscapular skinfold Triceps skinfold | ******** |
| Christensen et al.14 | 2016 | Norway | 61 | Children, Adolescents | Maternal LDL cholesterol | LDL Blood pressure BMI | ******* |
| Class et al.15 | 2014 | Sweden | 2133504 | Adolescents, Adults | Birth weight | Cardiac-related death Hypertension Ischemic heart disease Stroke Pulmonary circulation problems Type 2 diabetes mellitus | ******** |
| Crozier et al.16 | 2012 | United Kingdom | 977 | Children | Maternal nutritional status (vitamin D) | Fat mass Lean mass | ******** |
| Curhan et al.17 | 1996 | United States | 22846 | Adults | Birth weight | Hypertension Obesity Diabetes mellitus | ******* |
| Curhan et al.18 | 1996 | United States | 164040 | Adults | Birth weight | Blood pressure Hypertension BMI | ******* |
| Davis et al.19 | 2015 | Australia | 2868 | Adults | Maternal hypertension during pregnancy | Cardiovascular risk Hypertension Metabolic disease | ******** |
| Dubois et al.20 | 2006 | Canada | 1550 | Children | Birth weight | Overweight | ******** |
| Eriksson et al.21 | 2015 | Finland | 2003 | Adults | Maternal BMI during pregnancy Birth weight | BMI Fat mass Lean body mass Cholesterol Blood glucose | ******** |
| Eriksson et al.22 | 2003 | Finland | 4515 | Adults | Birth size Maternal BMI during pregnancy | Obesity | ******** |
| Fairley et al.23 | 2015 | United Kingdom | 987 | Children | Maternal BMI  Gestational diabetes | BMI | ******** |
| Finer et al.24 | 2016 | Bangladesh | 333 | Adults | Maternal nutritional deficit (famine) | Weight BMI Blood glucose | ******** |
| Francis-Emmanuel et al.25 | 2014 | Jamaica | 191 | Adolescents, Adults | Maternal nutritional deficit (marasmus, kwashiorkor) | Blood glucose Insulin Resistance | ******** |
| Frankel et al.26 | 1996 | United Kingdom | 1258 | Adults | Birth weight | BMI Coronary heart disease | ******** |
| Gale et al.27 | 2007 | United Kingdom | 216 | Children | Maternal size during pregnancy | Fat mass | ******** |
| Goldani et al.28 | 2007 | Brazil | 1189 | Adolescents | Birth weight Gestational age | BMI | ******** |
| Gomes et al.29 | 2013 | Brazil | 297 | Adolescents, Adults | Birth weight | BMI Waist to hip ratio Blood pressure Blood glucose  Total cholesterol | ******* |
| Graversen et al.30 | 2014 | Finland | 9525 | Children, Adolescents | Maternal BMI Birth weight | BMI | ******** |
| Griffiths et al.31 | 2010 | United Kingdom | 11653 | Children | Birth weight | Rapid weight gain | ******** |
| Haga et al.32 | 2012 | Japan | 1518 | Adolescents | Maternal weight Maternal nutritional deficit (skipping breakfast) | BMI | ********* |
| Hakola et al.33 | 2016 | Finland | 3807 | Children | Maternal BMI Maternal nutritional intake (fatty acid intake) Glucose tolerance | BMI | ******** |
| Heppe et al.34 | 2013 | The Netherlands | 3610 | Children | Maternal BMI Birth weight Gestational weight-gain Maternal nutritional intake | Overweight | ******** |
| Hrolfsdottir et al.35 | 2015 | Denmark | 308 | Adults | Gestational weight gain | BMI Waist circumference Blood lipids Glucose metabolism | ******** |
| Huang et al.36 | 2007 | Australia | 406 | Children | Birth weight | BMI Blood pressure Lipids Serum glucose | ******** |
| Hui et al.37 | 2003 | Hong Kong | 343 | Children | Birth weight | BMI | ******** |
| Iguacel et al.38 | 2018 | Spain | 1031 | Children | Gestational weight-gain Parental overweight/obesity Birth weight | Overweight/Obesity | ******** |
| Innes et al.39 | 2002 | United States | 23395 | Adolescents, Adults | Birth weight | Gestational diabetes mellitus | ********* |
| Jacota et al.40 | 2017 | France | 1069 | Children | Gestational weight gain | BMI Abdominal adiposity | ******** |
| Jarvelin et al.41 | 2004 | Finland | 5960 | Adults | Birth weight Birth length | Blood pressure | ******** |
| Jen et al.42 | 2017 | The Netherlands | 3312 | Children | Maternal diet during pregnancy (sugar-containing beverages) | BMI Fat mass index Fat-free index | ********* |
| Joglekar et al.43 | 2007 | India | 698 | Children | Birth weight | Fat mass Lean mass Insulin resistance Blood pressure  Glucose tolerance Plasma lipids | ********* |
| Jones et al.44 | 1998 | United Kingdom | 315 | Children, Adolescents, Adults | Birth weight Gestational diabetes Pre-eclampsia | Adolescent onset diabetes mellitus | ******** |
| Jones-Smith et al.45 | 2013 | Mexico | 586 | Children | Birth size Stunting BMI | Overweight | ******** |
| Keinan-Boker et al.46 | 2015 | Israel | 1086 | Adults | Maternal nutritional deficit (Holocaust survivors) | Hyperlipidemia Hypertension Diabetes mellitus Coronary heart disease Cancer Vascular disease | ******** |
| Kensara et al.47 | 2005 | United Kingdom | 32 | Adults | Birth weight | Body fat Fat mass Trunk to limb fat ratio | ******** |
| Kerkhof et al.48 | 2012 | The Netherlands | 280 | Adolescents, Adults | Birth weight | Fat mass Blood pressure HDL LDL Insulin sensitivity Metabolic syndrome | ******** |
| Kerr et al.49 | 2017 | Australia | 363 | Adolescents | Birth weight | BMI | ******** |
| Kim et al.50 | 2006 | South Korea | 152 | Adolescents | Birth weight | Insulin Resistance Blood pressure | ******** |
| Koupil & Toivanen51 | 2008 | Sweden | 6535 | Adolescents | Birth weight Birth weight for gestational age | BMI | ********* |
| Krishnaveni et al.52 | 2014 | India | 654 | Children, Adolescents | Maternal nutritional status (B12, folate) | Birth size Insulin resistance | ********* |
| Kuhle et al.53 | 2017 | Canada | 2016 | Children, Adolescents | Birth weight | BMI WHtR Blood pressure Total cholesterol HDL HbA1c | ******* |
| Labayen et al.54 | 2009 | Spain | 284 | Adolescents | Birth weight | Abdominal adiposity Fat mass | ******* |
| Laitinen et al.55 | 2012 | Finland | 6637 | Adolescents | Maternal gestational weight gain | BMI Abdominal obesity | ********* |
| Lamb et al.56 | 2010 | United States | 1178 | Children, Adolescents | Birth size Diabetes exposure in utero | BMI Weight gain | ********* |
| Lapidus et al.57 | 2008 | Sweden | 642 | Adults | Birth weight Birth length | Diabetes | ******** |
| Law et al.58 | 2000 | China, Guatemala, Chile, Nigeria, Sweden | 1570 | Children | Birth weight Birth length Head circumference | Blood pressure | ******** |
| Lawlor et al.59 | 2003 | United Kingdom | 1394 | Adults | Birth weight | Insulin resistance BMI | ******** |
| Lawlor et al.60 | 2004 | Australia | 3864 | Children | Maternal BMI Birth size | Blood pressure | ******** |
| Leermakers et al.61 | 2017 | The Netherlands | 2592 | Children | Maternal diet | Blood pressure Insulin HDL Triglycerides | ********* |
| Leong et al.62 | 2013 | United States | 1851 | Adults | Birth weight | BMI | ****** |
| Li et al.63 | 2007 | United States | 1739 | Children, Adolescents | Gestational weight gain Birth weight | Overweight/obesity | ******* |
| Li et al.64 | 2010 | China | 7874 | Adults | Maternal nutrition deficit (Chinese famine) | Hyperglycemia Type 2 diabetes | ******* |
| Li et al.65 | 2011 | China | 7874 | Adults | Maternal nutrition deficit (Chinese famine) | Hypertension | ******* |
| Liu et al.66 | 2017 | China | 8185 | Adults | Maternal nutritional deficit (famine) | BMI | ******** |
| Lourenco et al.67 | 2015 | Brazil | 255 | Children, Adolescents | Birth weight | BMI | ******** |
| Maftei et al.68 | 2015 | Australia | 163 | Children, Adolescents | Gestational diabetes Pregnancy weight gain | Insulin resistance | ******** |
| Mangrio et al.69 | 2010 | Sweden | 9009 | Children | Birth weight | Overweight/obesity | ******* |
| Mardones et al.70 | 2012 | Chile | 2152 | Adolescents | Birth weight Birth length | Blood pressure Lipids Glucose Insulin | ******** |
| Massion et al.71 | 2016 | United Kingdom | 11764 | Adolescents | Birth weight | BMI | ********* |
| McCarthy et al.72 | 2007 | United Kingdom | 679 | Adults | Birth weight | BMI Waist to hip ratio Waist circumference | ******** |
| Mi et al.73 | 2000 | China | 627 | Adults | Birth weight Maternal BMI during pregnancy | Blood pressure Plasma glucose Lipids | ********* |
| Monterio et al.74 | 2003 | Brazil | 1076 | Adolescents | Birth weight | BMI | ********* |
| Musa et al.75 | 2016 | South Africa | 1935 | Adolescents | Birth weight | Serum lipids Fat mass Fat free mass | ******* |
| Nilsson et al.76 | 2014 | Sweden | 232 | Children, Adolescents | Gestational diabetes | BMI | ******** |
| Okosun et al.77 | 2002 | United States | 666 | Children, Adolescents | Birth weight | Serum lipoprotein | ******** |
| Okubo et al.78 | 2014 | United Kingdom | 906 | Children | Maternal dietary glycemic index Maternal dietary glycemic load | Fat mass | ******** |
| Oster et al.79 | 2013 | Canada | 1439 | Children, Adolescents, Adults | Birth weight | Diabetes Hypertension BMI | ******* |
| Painter et al.80 | 2008 | The Netherlands | 855 | Adults | Maternal nutritional deficit (Dutch famine) | BMI Glucose LDL HDL Triglycerides | ******** |
| Parrino et al.81 | 2016 | Italy | 1521 | Children, Adolescents | Birth weight | BMI | ******* |
| Parsons et al.82 | 2001 | United Kingdom | 10683 | Children, Adolescents, Adults | Birth weight | BMI | ******** |
| Pearce et al.83 | 2005 | United Kingdom | 388 | Adults | Birth weight | Blood glucose | ******** |
| Pei et al.84 | 2013 | Germany | 3121 | Adolescents | Birth weight | BMI | ******** |
| Perng et al.85 | 2016 | United States | 963 | Children, Adolescents | Birth weight | BMI Fat mass Fat free mass | ******** |
| Pettitt & Knowler86 | 1998 | United States | 1536 | Children, Adolescents | Gestational diabetes Birth weight | Hyperglycemia Diabetes Obesity | ******** |
| Phillips & Young87 | 2000 | United Kingdom | 1750 | Adults | Birth weight | BMI | ******** |
| Plachta-Danielzik et al.88 | 2012 | Germany | 34230 | Children, Adolescents | Low weight gain during pregnancy Birth weight | BMI | ******** |
| Portrait et al.89 | 2011 | The Netherlands | 799 | Adults | Maternal nutritional deficit (Dutch famine) | Heart disease Diabetes mellitus | ********* |
| Potter & Ulijaszek90 | 2013 | United Kingdom | 11752 | Adolescents | Birth weight | BMI | ******* |
| Ravelli et al.91 | 1998 | The Netherlands | 702 | Adults | Maternal nutritional deficit (Dutch famine) | Blood glucose BMI | ******** |
| Ravelli et al.92 | 1999 | The Netherlands | 741 | Adults | Maternal nutritional deficit (Dutch famine) | BMI | ******** |
| Reilly et al.93 | 2005 | United Kingdom | 7758 | Children | Birth weight | BMI | ******** |
| Relton et al.94 | 2008 | United Kingdom | 483 | Children, Adolescents | Gestational age | Blood pressure | ******* |
| Reynolds et al.95 | 2010 | United Kingdom | 276 | Adults | Gestational weight-gain Maternal body composition Dietary intake during pregnancy | BMI Waist circumference Skinfold thickness Percentage body fat Fat mass index | ******** |
| Rios-Castillo et al.96 | 2015 | Chile | 652 | Children | Gestational weight gain Birth weight | BMI | ******** |
| Robinson et al.97 | 2015 | United Kingdom | 991 | Children | Gestational weight gain Vitamin D status | BMI Fat mass | ******** |
| Roseboom et al.98 | 1999 | The Netherlands | 739 | Adults | Maternal nutritional deficit (Dutch famine) | Blood pressure | ********* |
| Roseboom et al.99 | 2001 | The Netherlands | 2414 | Adults | Maternal nutritional deficit (Dutch famine) Maternal diet Maternal weight gain | Blood pressure | ********* |
| Rotar et al.100 | 2015 | Russian Federation | 356 | Adults | Maternal nutritional deficit (Leningrad siege) | Blood pressure Anthropometry Lipids Glucose | ********* |
| Sachdev et al.101 | 2005 | India | 1526 | Adults | Birth weight | BMI Waist circumference Hip circumference Central obesity Skinfold thickness Lean mass | ******** |
| Sayer et al.102 | 2004 | United Kingdom | 737 | Adults | Birth weight | BMI Fat free mass Fat mass | ******* |
| Sen et al.103 | 2018 | United States | 992 | Children, Adolescents | Maternal diet | BMI Waist circumference Skin fold thickness | ******** |
| Shi et al.104 | 2013 | Canada | 968 | Children, Adolescents | Birth weight | BMI | ******* |
| Shi et al.105 | 2018 | China | 5772 | Adults | Maternal nutritional deficit (Chinese famine) | Hypertension Heart attack Coronary heart disease Angina Congestive heart failure Stroke | ********* |
| Sipola-Leppänen et al.106 | 2015 | Finland | 720 | Adults | Birth weight Preterm birth | Body fat Waist circumference Blood pressure | ********* |
| Skogen et al.107 | 2014 | Norway | 480 | Adults | Birth weight Gestational age Birth length | Cardiovascular risk BMI Waist circumference Hip circumference HDL Blood pressure | ********* |
| Smith et al.108 | 2016 | United States | 63815 | Adults | Birth weight | BMI Coronary heart disease risk Cardiovascular disease | ******** |
| Stettler et al.109 | 2002 | Seychelles | 5514 | Children, Adolescents | Birth weight | BMI | ******** |
| Stratakis et al.110 | 2016 | The Netherlands, France, Belgium, Italy, Portugal, Norway, Spain, Ireland, United States, Poland, Greece | 26184 | Children | Maternal diet (fish intake) | BMI | ******** |
| Sun et al.111 | 2018 | China | 7262 | Adults | Maternal nutritional deficit (Chinese famine) | Type 2 diabetes | ********* |
| Tauzin et al.112 | 2014 | France | 31 | Adults | Preterm | Blood pressure | ******* |
| Terry et al.113 | 2007 | United States | 261 | Adults | Maternal weight gain Birth weight | BMI | ******** |
| Terry et al.114 | 2011 | United States | 20523 | Children | Maternal weight gain Birth weight Maternal BMI | BMI | ******** |
| Theodore et al.115 | 2015 | New Zealand | 975 | Children, Adolescents, Adults | Birth weight | Blood pressure | ********* |
| Thurber et al.116 | 2015 | Australia | 682 | Children | Birth weight | BMI | ******** |
| Tome et al.117 | 2007 | Brazil | 2797 | Children | Birth weight | BMI | ******** |
| Van Den Broek et al.118 | 2015 | The Netherlands | 2695 | Children | Maternal diet | BMI Fat mass | ******* |
| Van Den Hil et al.119 | 2013 | The Netherlands | 2863 | Children | Maternal diet | Blood pressure | ******* |
| Veena et al.120 | 2009 | India | 229 | Adults | Birth length | Type 2 diabetes | ******** |
| Wang et al.121 | 2017 | Hong Kong | 894 | Children, Adolescents | Birth weight  Gestational age | BMI | ******* |
| Wang et al.122 | 2016 | China | 1966 | Adults | Maternal nutritional deficit (Chinese famine) | Hypertension | ******** |
| Wang et al.123 | 2017 | China | 6445 | Adults | Maternal nutritional deficit (Chinese famine) | Metabolic syndrome | ******** |
| Wang et al.124 | 2015 | China | 6897 | Adults | Maternal nutritional deficit (Chinese famine) | Diabetes | ******** |
| Wang et al.125 | 2016 | China | 7801 | Adults | Maternal nutritional deficit (Chinese famine) | Type 2 diabetes Hyperglycemia | ********* |
| Wang et al.126 | 2012 | China | 12065 | Adults | Maternal nutritional deficit (Chinese famine) | Hypertension BMI | ********* |
| Werneck et al.127 | 2017 | Brazil | 981 | Adolescents | Birth weight | BMI Waist circumference Body fat | ******** |
| West et al.128 | 2011 | United States | 99 | Children, Adolescents | Gestational diabetes | BMI Waist circumference Blood pressure | ******** |
| Whitrow et al.129 | 2013 | Australia | 151 | Children | Birth size | Insulin resistance | ******** |
| Yu et al.130 | 2018 | China | 7915 | Adults | Maternal nutritional deficit (Chinese famine) | Metabolic syndrome | ******** |
| Yuan et al.131 | 2015 | China | 16580 | Children, Adolescents | Birth weight | BMI WHtR | ******** |
| Zadzinska & Rosset132 | 2013 | Poland | 812 | Children, Adolescents | Birth weight | BMI | ******* |
| Zarrati et al.133 | 2013 | Iran | 1184 | Adolescents | Birth weight | BMI Blood pressure Abdominal obesity | ******* |
| Zhang et al.134 | 2016 | China | 3766 | Children, Adolescents | Birth weight Gestational age | BMI | ******** |
| Zhao et al.135 | 2015 | China | 2824 | Children, Adolescents | Gestational diabetes | BMI | ******* |
| Zheng et al.136 | 2012 | China | 5040 | Adults | Maternal nutritional deficit (Chinese famine) | Metabolic syndrome | ******* |

References

1. Andersen CS, Gamborg M, Sørensen TIA, Nohr EA. Weight gain in different periods of pregnancy and offspring's body mass index at 7 years of age. *Int J Pediatr Obes*. 2011;6(2 -2), e179-e186.

2. Aris IM, Bernard JY, Chen LW, et al. Modifiable risk factors in the first 1000 days for subsequent risk of childhood overweight in an Asian cohort: Significance of parental overweight status. *Int J Obes*. 2018;42(1), 44-51.

3. Bammann K, Peplies J, De Henauw S, et al. Early life course risk factors for childhood obesity: The IDEFICS case-control study. *PLoS ONE*. 2014;9(2).

4. Bann D, Wills A, Cooper R, et al. Birth weight and growth from infancy to late adolescence in relation to fat and lean mass in early old age: Findings from the MRC national survey of health and development. *Int J Obes*. 2014;38(1), 69-75.

5. Bekkers MBM, Brunekreef B, Smit HA, et al. Early-life determinants of total and HDL cholesterol concentrations in 8-year-old children; the PIAMA birth cohort study. *PLoS ONE*. 2011;6(9).

6. Bercovich E, Keinan-Boker L, Shasha SM. Long-term health effects in adults born during the Holocaust. *Isr Med Assoc J*. 2014;16(4), 203-207.

7. Bettiol H, Sabbag Filho D, Haeffner LSB, et al. Do intrauterine growth restriction and overweight at primary school age increase the risk of elevated body mass index in young adults? *Braz J Med Biol Res*. 2007;40(9), 1237-1243.

8. Bhattacharya S, McNeill G, Raja EA, et al. Maternal gestational weight gain and offspring's risk of cardiovascular disease and mortality. *Heart*. 2016;102(18), 1456-1463.

9. Boone-Heinonen J, Sacks RM, Takemoto EE, et al. Prenatal Development and Adolescent Obesity: Two Distinct Pathways to Diabetes in Adulthood. *Child Obes*. 2018;14(3), 173-181.

10. Borja JB. The impact of early nutrition on health: Key findings from the cebu longitudinal health and nutrition survey (CLHNS). *Malays J Nutr*. 2013;19(1), 1-8.

11. Brei C, Stecher L, Meyer DM, et al. Impact of dietary macronutrient intake during early and late gestation on offspring body composition at birth, 1, 3, and 5 years of age. *Nutrients*. 2018;10(5).

12. Chen LW, Aris IM, Bernard JY, et al. Associations of maternal macronutrient intake during pregnancy with infant BMI peak characteristics and childhood BMI. *Am J Clin Nutr*. 2017;105(3), 705-713.

13. Chen LW, Aris IM, Bernard JY, et al. Associations of maternal dietary patterns during pregnancy with offspring adiposity from birth until 54 months of age. *Nutrients*. 2016;9(1).

14. Christensen JJ, Retterstøl K, Godang K, et al. LDL cholesterol in early pregnancy and offspring cardiovascular disease risk factors. *J Clin Lipidology*. 2016;10(6), 1369-1378.e1367.

15. Class QA, Rickert ME, Lichtenstein P, D'Onofrio BM. Birth weight, physical morbidity, and mortality: A population-based sibling-comparison study. *Am J Epidemiol*. 2014;179(5), 550-558.

16. Crozier SR, Harvey NC, Inskip HM, Godfrey KM, Cooper C, Robinson SM. Maternal vitamin D status in pregnancy is associated with adiposity in the offspring: Findings from the Southampton Women's Survey. *Am J Clin Nutr*. 2012;96(1), 57-63.

17. Curhan GC, Willett WC, Rimm EB, Spiegelman D, Ascherio AL, Stampfer MJ. Birth weight and adult hypertension, diabetes mellitus, and obesity in US men. *CIRCULATION*. 1996;94(12), 3246-3250.

18. Curhan GC, Chertow GM, Willett WC, et al. Birth weight and adult hypertension and obesity in women. *CIRCULATION*. 1996;94(6), 1310-1315.

19. Davis EF, Lewandowski AJ, Aye C, et al. Clinical cardiovascular risk during young adulthood in offspring of hypertensive pregnancies: Insights from a 20-year prospective follow-up birth cohort. *BMJ Open*. 2015;5(6).

20. Dubois L, Girard M. Early determinants of overweight at 4.5 years in a population-based longitudinal study. *Int J Obes*. 2006;30(4), 610-617.

21. Eriksson JG, Sandboge S, Salonen M, Kajantie E, Osmond C. Maternal weight in pregnancy and offspring body composition in late adulthood: Findings from the Helsinki Birth Cohort Study (HBCS). *Ann Med*. 2015;47(2), 94-99.

22. Eriksson J, Forsén T, Osmond C, Barker D. Obesity from cradle to grave. *Int J Obes*. 2003;27(6), 722-727.

23. Fairley L, Santorelli G, Lawlor DA, et al. The relationship between early life modifiable risk factors for childhood obesity, ethnicity and body mass index at age 3 years: Findings from the Born in Bradford birth cohort study. *BMC Obesity*. 2015;2 (1) (no pagination)(9).

24. Finer S, Iqbal MS, Lowe R, et al. Is famine exposure during developmental life in rural Bangladesh associated with a metabolic and epigenetic signature in young adulthood? A historical cohort study. *BMJ Open*. 2016;6(11), e011768.

25. Francis-Emmanuel PM, Thompson DS, Barnett AT, et al. Glucose metabolism in adult survivors of severe acute malnutrition. *J Clin Endocrinol Metab*. 2014;99(6), 2233-2240.

26. Frankel S, Elwood P, Sweetnam P, Yarnell J, Davey Smith G. Birthweight, body-mass index in middle age, and incident coronary heart disease. *Lancet*. 1996;348(9040), 1478-1480.

27. Gale CR, Javaid MK, Robinson SM, Law CM, Godfrey KM, Cooper C. Maternal size in pregnancy and body composition in children. *J Clin Endocrinol Metab*. 2007;92(10), 3904-3911.

28. Goldani MZ, Haeffner LSB, Agranonik M, Barbieri MA, Bettiol H, da Silva AAM. Do early life factors influence body mass index in adolescents? *Braz J Med Biol Res*. 2007;40(9), 1231-1236.

29. Gomes FM, Subramanian SV, Escobar AM, et al. No association between low birth weight and cardiovascular risk factors in early adulthood: evidence from Sao Paulo, Brazil. *PLoS ONE [Electronic Resource]*. 2013;8(6), e66554.

30. Graversen L, Sørensen TIA, Petersen L, et al. Stability of the associations between early life risk indicators and adolescent overweight over the evolving obesity epidemic. *PLoS ONE*. 2014;9(4).

31. Griffiths LJ, Hawkins SS, Cole TJ, Dezateux C. Risk factors for rapid weight gain in preschool children: Findings from a UK-wide prospective study. *Int J Obes*. 2010;34(4), 624-632.

32. Haga C, Kondo N, Suzuki K, et al. Developmental Trajectories of Body Mass Index Among Japanese Children and Impact of Maternal Factors during Pregnancy. *PLoS ONE*. 2012;7(12).

33. Hakola L, Takkinen HM, Niinistö S, et al. Maternal fatty acid intake during pregnancy and the development of childhood overweight: a birth cohort study. *Pediatr Obes*. 2016;12, 26-37.

34. Heppe DHM, Kiefte-De Jong JC, Durmuş B, et al. Parental, fetal, and infant risk factors for preschool overweight: The Generation R Study. *Pediatr Res*. 2013;73(1), 120-127.

35. Hrolfsdottir L, Rytter D, Olsen SF, et al. Gestational weight gain in normal weight women and offspring cardio-metabolic risk factors at 20 years of age. *Int J Obes*. 2015;39(4), 671-676.

36. Huang RC, Burke V, Newnham JP, et al. Perinatal and childhood origins of cardiovascular disease. *Int J Obes*. 2007;31(2), 236-244.

37. Hui LL, Nelson EAS, Yu LM, Li AM, Fok TF. Risk factors for childhood overweight in 6- To 7-y-old Hong Kong children. *Int J Obes*. 2003;27(11), 1411-1418.

38. Iguacel I, Escartín L, Fernández-Alvira JM, et al. Early life risk factors and their cumulative effects as predictors of overweight in Spanish children. *Int J Public Health*. 2018;63(4), 501-512.

39. Innes KE, Byers TE, Marshall JA, Baron A, Orleans M, Hamman RF. Association of a woman's own birth weight with subsequent risk for gestational diabetes.[Erratum appears in JAMA 2002 Jun 26;287(24):3212]. *JAMA*. 2002;287(19), 2534-2541.

40. Jacota M, Forhan A, Saldanha-Gomes C, Charles MA, Heude B, for the EM-CCSG. Maternal weight prior and during pregnancy and offspring's BMI and adiposity at 5–6 years in the EDEN mother–child cohort. *Pediatr Obes*. 2017;12(4), 320-329.

41. Järvelin MR, Sovio U, King V, et al. Early life factors and blood pressure at age 31 years in the 1966 Northern Finland birth cohort. *Hypertension*. 2004;44(6), 838-846.

42. Jen V, Erler NS, Tielemans MJ, et al. Mothers' intake of sugar-containing beverages during pregnancy and body composition of their children during childhood: The Generation R Study. *Am J Clin Nutr*. 2017;105(4), 834-841.

43. Joglekar CV, Fall CHD, Deshpande VU, et al. Newborn size, infant and childhood growth, and body composition and cardiovascular disease risk factors at the age of 6 years: The Pune Maternal Nutrition Study. *Int J Obes*. 2007;31(10), 1534-1544.

44. Jones ME, Swerdlow AJ, Gill LE, Goldacre MJ. Pre-natal and early life risk factors for childhood onset diabetes mellitus: A record linkage study. *Int J Epidemiol*. 1998;27(3), 444-449.

45. Jones-Smith JC, Neufeld LM, Laraia B, Ramakrishnan U, Garcia-Guerra A, Fernald LCH. Early life growth trajectories and future risk for overweight. *Nutr Diabetes*. 2013;3(FEBRUARY).

46. Keinan-Boker L, Shasha-Lavsky H, Eilat-Zanani S, Edri-Shur A, Shasha SM. Chronic health conditions in Jewish Holocaust survivors born during world war II. *Isr Med Assoc J*. 2015;17(4), 206-212.

47. Kensara OA, Wootton SA, Phillips DI, Patel M, Jackson AA, Elia M. Fetal programming of body composition: Relation between birth weight and body composition measured with dual-energy X-ray absorptiometry and anthropometric methods in older Englishmen. *Am J Clin Nutr*. 2005;82(5), 980-987.

48. Kerkhof GF, Leunissen RWJ, Hokken-Koelega ACS. Early origins of the metabolic syndrome: Role of small size at birth, early postnatal weight gain, and adult IGF-I. *J Clin Endocrinol Metab*. 2012;97(8), 2637-2643.

49. Kerr JA, Long C, Clifford SA, et al. Early-life exposures predicting onset and resolution of childhood overweight or obesity. *Arch Dis Child*. 2017;102(10), 915-922.

50. Kim CS, Park JS, Park J, et al. The relation between birth weight and insulin resistance in Korean adolescents. *Yonsei Med J*. 2006;47(1), 85-92.

51. Koupil I, Toivanen P. Social and early-life determinants of overweight and obesity in 18-year-old Swedish men. *Int J Obes*. 2008;32(1), 73-81.

52. Krishnaveni GV, Veena SR, Karat SC, Yajnik CS, Fall CHD. Association between maternal folate concentrations during pregnancy and insulin resistance in Indian children. *Diabetologia*. 2014;57(1), 110-121.

53. Kuhle S, Maguire B, Ata N, MacInnis N, Dodds L. Birth Weight for Gestational Age, Anthropometric Measures, and Cardiovascular Disease Markers in Children. *J Pediatr*. 2017;182, 99-106.

54. Labayen I, Ruiz JR, Vicente-Rodríguez G, et al. Early life programming of abdominal adiposity in adolescents: The HELENA study. *DIABETES CARE*. 2009;32(11), 2120-2122.

55. Laitinen J, Jääskeläinen A, Hartikainen AL, et al. Maternal weight gain during the first half of pregnancy and offspring obesity at 16 years: A prospective cohort study. *BJOG Int J Obstet Gynaecol*. 2012;119(6), 716-723.

56. Lamb MM, Dabelea D, Yin X, et al. Early-life predictors of higher body mass index in healthy children. *Ann Nutr Metab*. 2010;56(1), 16-22.

57. Lapidus L, Andersson SW, Bengtsson C, Björkelund C, Rossander-Hulthén L, Lissner L. Weight and length at birth and their relationship to diabetes incidence and all-cause mortality-A 32-year follow-up of the population study of women in Gothenburg, Sweden. *Prim Care Diabetes*. 2008;2(3), 127-133.

58. Law CM, Egger P, Dada O, et al. Body size at birth and blood pressure among children in developing countries. *Int J Epidemiol*. 2001;30(1), 52-57.

59. Lawlor DA, Smith GD, Ebrahim S. Life course influences on insulin resistance: Findings from the British women's heart and health study. *DIABETES CARE*. 2003;26(1), 97-103.

60. Lawlor DA, Najman JM, Sterne J, Williams GM, Ebrahim S, Smith GD. Associations of parental, birth, and early life characteristics with systolic blood pressure at 5 years of age: Findings from the Mater-University study of pregnancy and its outcomes. *CIRCULATION*. 2004;110(16), 2417-2423.

61. Leermakers ETM, Tielemans MJ, van den Broek M, Jaddoe VWV, Franco OH, Kiefte-de Jong JC. Maternal dietary patterns during pregnancy and offspring cardiometabolic health at age 6 years: The generation R study. *Clin Nutr*. 2017;36(2), 477-484.

62. Leong NM, Mignone LI, Newcomb PA, et al. Early life risk factors in cancer: The relation of birth weight to adult obesity. *Int J Cancer*. 2003;103(6), 789-791.

63. Li C, Goran MI, Kaur H, Nollen N, Ahluwalia JS. Developmental trajectories of overweight during childhood: Role of early life factors. *Obesity*. 2007;15(3), 760-771.

64. Li Y, He Y, Qi L, et al. Exposure to the Chinese famine in early life and the risk of hyperglycemia and type 2 diabetes in adulthood. *Diabetes*. 2010;59(10), 2400-2406.

65. Li Y, Jaddoe VW, Qi L, et al. Exposure to the Chinese famine in early life and the risk of hypertension in adulthood. *J Hypertens*. 2011;29(6), 1085-1092.

66. Liu L, Pang ZC, Sun JP, et al. Exposure to famine in early life and the risk of obesity in adulthood in Qingdao: Evidence from the 1959–1961 Chinese famine. *Nutr Metab Cardiovasc Dis*. 2017;27(2), 154-160.

67. Lourenço BH, Villamor E, Augusto RA, Cardoso MA. Influence of early life factors on body mass index trajectory during childhood: A population-based longitudinal analysis in the Western Brazilian Amazon. *Matern Child Nutr*. 2015;11(2), 240-252.

68. Maftei O, Whitrow MJ, Davies MJ, Giles LC, Owens JA, Moore VM. Maternal body size prior to pregnancy, gestational diabetes and weight gain: Associations with insulin resistance in children at 9-10 years. *DIABETIC MED*. 2015;32(2), 174-180.

69. Mangrio E, Lindstrom M, Rosvall M. Early life factors and being overweight at 4 years of age among children in Malmo, Sweden. *BMC Public Health*. 2010;10, 764.

70. Mardones F, Villarroel L, Arnaiz P, et al. Prenatal growth and metabolic syndrome components among Chilean children. *J Dev Orig Health Dis*. 2012;3(4), 237-244.

71. Massion S, Wickham S, Pearce A, Barr B, Law C, Taylor-Robinson DJAodic. Exploring the impact of early life factors on inequalities in risk of overweight in UK children: findings from the UK Millennium Cohort Study. 2016;101(8), 724-730.

72. McCarthy A, Hughes R, Tilling K, Davies D, Smith GD, Ben-Shlomo Y. Birth weight; postnatal, infant, and childhood growth; and obesity in young adulthood: Evidence from the Barry Caerphilly Growth Study. *Am J Clin Nutr*. 2007;86(4), 907-913.

73. Mi J, Law C, Zhang KL, Osmond C, Stein C, Barker D. Effects of infant birthweight and maternal body mass index in pregnancy on components of the insulin resistance syndrome in China. *Ann Intern Med*. 2000;132(4), 253-260.

74. Monteiro POA, Victora CG, Barros FC, Monteiro LMA. Birth size, early childhood growth, and adolescent obesity in a Brazilian birth cohort. *Int J Obes*. 2003;27(10), 1274-1282.

75. Musa MG, Kagura J, Pisa PT, Norris SA. Relationship between early growth and CVD risk factors in adolescents. *J Dev Orig Health Dis*. 2016;7(2), 132-143.

76. Nilsson C, Carlsson A, Landin-Olsson M. Increased risk for overweight among Swedish children born to mothers with gestational diabetes mellitus. *Pediatr Diabetes*. 2014;15(1), 57-66.

77. Okosun IS, Dever GEA, Choi ST. Low birth weight is associated with elevated serum lipoprotein(a) in white and black American children ages 5-11y. *Public Health*. 2002;116(1), 33-38.

78. Okubo H, Crozier SR, Harvey NC, et al. Maternal dietary glycemic index and glycemic load in early pregnancy are associated with offspring adiposity in childhood: The Southampton Women's Survey. *Am J Clin Nutr*. 2014;100(2), 676-683.

79. Oster RT, Luyckx VA, Toth EL. Birth weight predicts both proteinuria and overweight/obesity in a rural population of Aboriginal and non-Aboriginal Canadians. *J Dev Orig Health Dis*. 2013;4(2), 139-145.

80. Painter RC, Osmond C, Gluckman P, Hanson M, Phillips DIW, Roseboom TJ. Transgenerational effects of prenatal exposure to the Dutch famine on neonatal adiposity and health in later life. *BJOG Int J Obstet Gynaecol*. 2008;115(10), 1243-1249.

81. Parrino C, Vinciguerra F, La Spina N, et al. Influence of early-life and parental factors on childhood overweight and obesity. *J Endocrinol Invest*. 2016;39(11), 1315-1321.

82. Parsons TJ, Power C, Manor O. Fetal and early life growth and body mass index from birth to early adulthood in 1958 British cohort: Longitudinal study. *BMJ*. 2001;323(7325), 1331-1335.

83. Pearce MS, Unwin NC, Relton CL, Alberti KGMM, Parker L. Lifecourse determinants of fasting and post-challenge glucose at age 50 years: The Newcastle thousand families study. *Eur J Epidemiol*. 2005;20(11), 915-923.

84. Pei Z, Flexeder C, Fuertes E, et al. Early life risk factors of being overweight at 10 years of age: Results of the German birth cohorts GINIplus and LISAplus. *Eur J Clin Nutr*. 2013;67(8), 855-862.

85. Perng W, Hajj H, Belfort MB, et al. Birth size, early life weight gain, and midchildhood cardiometabolic health. *J Pediatr*. 2016;173, 122-130.e121.

86. Pettitt DJ, Knowler WC. Long-term effects of the intrauterine environment, birth weight, and breast-feeding in Pima Indians. *DIABETES CARE*. 1998;21 Suppl 2, B138-141.

87. Phillips DIW, Young JB. Birth weight, climate at birth and the risk of obesity in adult life. *Int J Obes*. 2000;24(3), 281-287.

88. Plachta-Danielzik S, Kehden B, Landsberg B, et al. Attributable risks for childhood overweight: Evidence for limited effectiveness of prevention. *Pediatrics*. 2012;130(4), e865-e871.

89. Portrait F, Teeuwiszen E, Deeg D. Early life undernutrition and chronic diseases at older ages: The effects of the Dutch famine on cardiovascular diseases and diabetes. *Soc Sci Med*. 2011;73(5), 711-718.

90. Potter CM, Ulijaszek SJ. Predicting adult obesity from measures in earlier life. *J Epidemiol Community Health*. 2013;67(12), 1032-1037.

91. Ravelli ACJ, Van Der Meulen JHP, Michels RPJ, et al. Glucose tolerance in adults after prenatal exposure to famine. *Lancet*. 1998;351(9097), 173-177.

92. Ravelli ACJ, Van Der Meulen JHP, Osmond C, Barker DJP, Bleker OP. Obesity at the age of 50 y in men and women exposed to famine prenatally. *Am J Clin Nutr*. 1999;70(5), 811-816.

93. Reilly JJ, Armstrong J, Dorosty AR, et al. Early life risk factors for obesity in childhood: Cohort study. *BR MED J*. 2005;330(7504), 1357-1359.

94. Relton CL, Pearce MS, O'Sullivan JJ. The relationship between gestational age, systolic blood pressure and pulse pressure in children. *J Hum Hypertens*. 2008;22(5), 352-357.

95. Reynolds RM, Osmond C, Phillips DIW, Godfrey KM. Maternal BMI, parity, and pregnancy weight gain: Influences on offspring adiposity in young adulthood. *J Clin Endocrinol Metab*. 2010;95(12), 5365-5369.

96. Rios-Castillo I, Cerezo S, Corvalán C, Martínez M, Kain J. Risk factors during the prenatal period and the first year of life associated with overweight in 7-year-old low-income Chilean children. *Matern Child Nutr*. 2015;11(4), 595-605.

97. Robinson SM, Crozier SR, Harvey NC, et al. Modifiable early-life risk factors for childhood adiposity and overweight: An analysis of their combined impact and potential for prevention. *Am J Clin Nutr*. 2015;101(2), 368-375.

98. Roseboom TJ, Van Der Meulen JHP, Ravelli ACJ, et al. Blood pressure in adults after prenatal exposure to famine. *J Hypertens*. 1999;17(3), 325-330.

99. Roseboom TJ, Van der Meulen JHP, Van Montfrans GA, et al. Maternal nutrition during gestation and blood pressure in later life. *J Hypertens*. 2001;19(1), 29-34.

100. Rotar O, Moguchaia E, Boyarinova M, et al. Seventy years after the siege of Leningrad: Does early life famine still affect cardiovascular risk and aging? *J Hypertens*. 2015;33(9), 1772-1779.

101. Sachdev HS, Fall CHD, Osmond C, et al. Anthropometric indicators of body composition in young adults: Relation to size at birth and serial measurements of body mass index in childhood in the New Delhi birth cohort. *Am J Clin Nutr*. 2005;82(2), 456-466.

102. Sayer AA, Syddall HE, Dennison EM, et al. Birth weight, weight at 1 y of age, and body composition in older men: findings from the Hertfordshire Cohort Study. *Am J Clin Nutr*. 2004;80(1), 199-203.

103. Sen S, Rifas-Shiman SL, Shivappa N, et al. Associations of prenatal and early life dietary inflammatory potential with childhood adiposity and cardiometabolic risk in Project Viva. *Pediatr Obes*. 2018;13(5), 292-300.

104. Shi Y, de Groh M, Morrison H. Perinatal and early childhood factors for overweight and obesity in young Canadian children. *Can J Public Health*. 2013;104(1), e69-e74.

105. Shi Z, Nicholls SJ, Taylor AW, Magliano DJ, Appleton S, Zimmet P. Early life exposure to Chinese famine modifies the association between hypertension and cardiovascular disease. *J Hypertens*. 2018;36(1), 54-60.

106. Sipola-Leppanen M, Vaarasmaki M, Tikanmaki M, et al. Cardiometabolic risk factors in young adults who were born preterm. *Am J Epidemiol*. 2015;181(11), 861-873.

107. Skogen JC, Stewart R, Knapstad M, Overland S, Mykletun A. Early life factors in relation to cardiovascular risk and cardiovascular disease in old age in Bergen: A Norwegian retrospective cohort study based on the Hordaland Health Study (HUSK). *JRSM Short Reports*. 2014;5(7), 1-12.

108. Smith CJ, Ryckman KK, Barnabei VM, et al. The impact of birth weight on cardiovascular disease risk in the Women's Health Initiative. *Nutr Metab Cardiovasc Dis*. 2016;26(3), 239-245.

109. Stettler N, Bovet P, Shamlaye H, Zemel BS, Stallings VA, Paccaud F. Prevalence and risk factors for overweight and obesity in children from Seychelles, a country in rapid transition: The importance of early growth. *Int J Obes*. 2002;26(2), 214-219.

110. Stratakis N, Roumeliotaki T, Oken E, et al. Fish intake in pregnancy and child growth: A pooled analysis of 15 European and US birth cohorts. *JAMA Pediatr*. 2016;170(4), 381-390.

111. Sun Y, Zhang L, Duan W, Meng X, Jia C. Association between famine exposure in early life and type 2 diabetes mellitus and hyperglycemia in adulthood: Results from the China Health And Retirement Longitudinal Study (CHARLS). *Journal of Diabetes*. 2018; doi: <http://dx.doi.org/10.1111/1753-0407.12653>.

112. Tauzin L, Rossi P, Grosse C, et al. Increased systemic blood pressure and arterial stiffness in young adults born prematurely. *J Dev Orig Health Dis*. 2014;5(6), 448-452.

113. Terry MB, Wei Y, Esserman D. Maternal, birth, and early-life influences on adult body size in women. *Am J Epidemiol*. 2007;166(1), 5-13.

114. Terry MB, Wei Y, Esserman D, McKeague IW, Susser E. Pre-and postnatal determinants of childhood body size: Cohort and sibling analyses. *J Dev Orig Health Dis*. 2011;2(2), 99-111.

115. Theodore RF, Broadbent J, Nagin D, et al. Childhood to Early-Midlife Systolic Blood Pressure Trajectories: Early-Life Predictors, Effect Modifiers, and Adult Cardiovascular Outcomes. *Hypertension*. 2015;66(6), 1108-1115.

116. Thurber KA, Dobbins T, Kirk M, Dance P, Banwell C. Early life predictors of increased body mass index among indigenous Australian children. *PLoS ONE*. 2015;10(6).

117. Tomé FS, Cardoso VC, Barbieri MA, et al. Are birth weight and maternal smoking during pregnancy associated with malnutrition and excess weight among school age children? *Braz J Med Biol Res*. 2007;40(9), 1221-1230.

118. Van Den Broek M, Leermakers ETM, Jaddoe VWV, et al. Maternal dietary patterns during pregnancy and body composition of the child at age 6 y: The Generation R Study. *Am J Clin Nutr*. 2015;102(4), 873-880.

119. Van Den Hil LCL, Taal HR, De Jonge LL, et al. Maternal first-trimester dietary intake and childhood blood pressure: The Generation R Study. *Br J Nutr*. 2013;110(8), 1454-1464.

120. Veena SR, Wills AK, Fisher DJ, et al. Early life factors and type 2 diabetes in south India: Do the associations change with age? *J Diabetes*. 2009;1(3), 218-226.

121. Wang JJ, Gao Y, Lau PWC. Prevalence of overweight in Hong Kong Chinese children: Its associations with family, early-life development and behaviors-related factors. *J Exerc Sci Fitness*. 2017;15(2), 89-95.

122. Wang Z, Li C, Yang Z, Zou Z, Ma J. Infant exposure to Chinese famine increased the risk of hypertension in adulthood: Results from the China Health and Retirement Longitudinal Study. *BMC Public Health*. 2016;16(1).

123. Wang N, Wang X, Li Q, et al. The famine exposure in early life and metabolic syndrome in adulthood. *Clin Nutr*. 2017;36(1), 253-259.

124. Wang N, Wang X, Han B, et al. Is exposure to famine in childhood and economic development in adulthood associated with diabetes? *J Clin Endocrinol Metab*. 2015;100(12), 4514-4523.

125. Wang J, Li Y, Han X, et al. Exposure to the Chinese famine in childhood increases type 2 diabetes risk in adults. *J Nutr*. 2016;146(11), 2289-2295.

126. Wang PX, Wang JJ, Lei YX, Xiao L, Luo ZC. Impact of Fetal and Infant Exposure to the Chinese Great Famine on the Risk of Hypertension in Adulthood. *PLoS ONE*. 2012;7(11).

127. Werneck AO, Silva DRP, Collings PJ, et al. Birth weight, biological maturation and obesity in adolescents: A mediation analysis. *J Dev Orig Health Dis*. 2017;8(4), 502-507.

128. West NA, Crume TL, Maligie MA, Dabelea D. Cardiovascular risk factors in children exposed to maternal diabetes in utero. *Diabetologia*. 2011;54(3), 504-507.

129. Whitrow MJ, Davies MJ, Giles LC, et al. Effects of birth size, post-natal growth and current size on insulin resistance in 9-year-old children: A prospective cohort study. *Eur J Pediatr*. 2013;172(9), 1207-1214.

130. Yu C, Wang J, Wang F, et al. Victims of Chinese famine in early life have increased risk of metabolic syndrome in adulthood. *Nutrition*. 2018;53, 20-25.

131. Yuan ZP, Yang M, Liang L, et al. Possible role of birth weight on general and central obesity in Chinese children and adolescents: A cross-sectional study. *Ann Epidemiol*. 2015;25(10), 748-752.

132. Zadzińska E, Rosset I. Pre-natal and perinatal factors affecting body mass index in pre-pubertal polish children. *Ann Hum Biol*. 2013;40(6), 477-484.

133. Zarrati M, Shidfar F, Razmpoosh E, et al. Does low birth weight predict hypertension and obesity in schoolchildren? *Ann Nutr Metab*. 2013;63(1-2), 69-76.

134. Zhang T, Cai L, Ma L, Jing J, Chen Y, Ma J. The prevalence of obesity and influence of early life and behavioral factors on obesity in Chinese children in Guangzhou. *BMC Public Health*. 2016;16(1).

135. Zhao YL, Ma RM, Lao TT, et al. Maternal gestational diabetes mellitus and overweight and obesity in offspring: A study in Chinese children. *J Dev Orig Health Dis*. 2015;6(6), 479-484.

136. Zheng X, Wang Y, Ren W, et al. Risk of metabolic syndrome in adults exposed to the great Chinese famine during the fetal life and early childhood. *Eur J Clin Nutr*. 2012;66(2), 231-236.
